# Supplementary material for: Integrin α5β1 contributes to cell fusion and inflammation mediated by SARS-CoV-2 spike via RGD-independent interaction
Source: PubMed Central journal article supplement — Proc Natl Acad Sci U S A. 2023 Dec 7;120(50):e2311913120. doi: 10.1073/pnas.2311913120 (PMC10723138; doi:10.1073/pnas.2311913120), 2023-12-07
Supplement: pnas.2311913120.sapp.pdf [file pnas.2311913120.sapp.pdf]

## Supplementary methods and figures

### *DNA constructs.*

The human wild type  $\alpha_5$  and  $\beta_1$  integrins were in pcDNA3.1/Myc-His (-) A and pEF vectors, respectively (1). The  $\alpha_5$  with C-terminal EGFP tag ( $\alpha_5$ -EGFP) was a gift from Rick Horwitz (Addgene plasmid #15238) (2). The pQCXIP-GFP1-10 (Addgene plasmid #68715) and pQCIP-BSR-GFP11 (Addgene plasmid #68716) were a gift from Yutaka Hata (3). The  $\alpha_5$ -FKPB12 construct was generated by replacing the EGFP with FKPB12 in  $\alpha_5$ -EGFP plasmid. The  $\beta_1$  with C-terminal GFPspark tag ( $\beta_1$ -GFP) was from Sino Biological. The  $\alpha_5$  CT truncation ( $\alpha_5$ -CTTr, at R987) was as described before (1). The  $\beta_1$  S132A-S134A ( $\beta_1$ -SSAA) mutations were generated by QuikChange site-directed mutagenesis. Integrin  $\alpha_5$  CRISPR/Cas9 KO plasmid was from Santa Cruz Biotechnology. The human full-length ACE2 with N-terminal Flag-tag was from Sino Biological. The full-length SARS-CoV-2 spike, pcDNA3.1-SARS2-Spike, and SARS-CoV spike, pcDNA3.1-SARS-Spike, both of which contain a C-terminal C9 tag, were a gift from Fang Li (Addgene plasmids #145032 and #145031) (4). The pCMV/R vector containing SARS2-S gene from Omicron variant (B.1.1.529) was from BEI resources (NR-56470). The SARS2-S RGD to RGA mutation was generated by QuikChange site-directed mutagenesis. The SARS-CoV-2 and SARS-CoV full-length spike proteins were cloned with N-terminal Flag tag into a modified pIRES2-DsRed vector with a C-terminal PC-tag. The S1 and S2 subunits of the SARS-CoV-2 spike ectodomain were cloned with C-terminal human IgG1 Fc tag into a modified pIRES2-EGFP vector.

### *Cell lines.*

HEK293T-ACE2 stable cells were generated by stable transfection of N-Flag tagged human full-length ACE2 into HEK293T cells. Single-cell clones with high ACE2 surface expression were selected by fluorescence activated single-cell sorting. The Vero E6 cells expressing high endogenous ACE2 were from BEI Resources (NR-53726). The primary human peripheral blood mononuclear cells (PBMC) and neutrophils were obtained from ReachBio Research Labs or Cellero. The HEK293 and Vero E6 cells were grown in complete DMEM (Corning) supplemented with 10% fetal bovine serum (FBS) (Sigma-Aldrich). Primary human umbilical vein endothelial cells (HUVEC) were provided by the Blood Research Institute Core facility. The immortalized HUVEC cells (HUVEC) were generated by transducing HUVEC cells with recombinant retrovirus LXSN16 E6/E7 as previously described (5). HUVEC cells were grown in 0.1% gelatin-precoated T75 flasks or 100mm tissue culture dishes, in DMEM medium completed with 15% FBS, 0.05 mg/ml endothelial cell growth supplement (ECGS, BD Biosciences), 6.452 U/ml of Heparin (Sigma), 5  $\mu$ g/ml gentamicin sulfate (Cellgro). The  $\alpha_5$  expression was knocked out by transfection of CRISPR/Cas9  $\alpha_5$ -KO plasmid into HEK293T, HEK293T-ACE2 and Vero E6 cells as described before (1, 6). For  $\alpha_5$  knockout in HUVEC cells, 2  $\mu$ g plasmid in 100  $\mu$ l of HUVEC growth medium was mixed with  $4 \times 10^6$  HUVEC cells. The transfection was performed using Amaxa™ Cell Line Nucleofector™ Kit C (Lonza, US) and Nucleofector™ 2b Device (Lonza) according to the manufacture's protocol. The  $\alpha_5$  negative cells were sorted using a BD FACSMelody™ Cell Sorter (BD Biosciences). The cell surface

expression of  $\alpha_5$  was detected by flow cytometry with mAb VC5 (BD Biosciences) as described (7). The total  $\alpha_5$  in cell lysate was detected by immunoblot with mAb A-11 (Santa Cruz Biotechnology).

### *Recombinant proteins.*

The following purified proteins were obtained through BEI Resources, NIAID, NIH: the SARS-CoV-2 spike (SARS2-S, Wuhan-Hu-1) ectodomain stabilized by substitution at the S1/S2 furin cleavage site (RRAR to GSAS, residues 682 to 685) and stabilizing mutations (K986P and V987P), expressed in HEK293 cells with a C-terminal T4 foldon trimerization domain and octa-histidine tag, NR-53257; the same SARS2-S ectodomain construct as NR-53257 with an additional C-terminal Twin-Strep tag, expressed in CHO pYW cells, NR-53937; the SARS2-S RBD domain with a C-terminal hexa-histidine tag, expressed in HEK293T cells, NR-52946; The SARS2-S (Stabilized) from SARS-CoV-2, BA.2 Lineage (Omicron variant) with C-terminal His and Avi tags, recombinant from HEK293 cells, NR-56517; The SARS2-S (Stabilized) from SARS-CoV-2, Delta variant with C-terminal His and Avi tags, recombinant from HEK293 Cells, NR-55614. The CHO cells produced SARS-CoV spike (SARS-S) ectodomain stabilized with two proline mutations (K968P and V969P) and a C-terminal GCN4-IZ trimerization domain plus a hexa-histidine tag was obtained from R&D Systems. The human ACE2 ectodomain with a human IgG1 Fc tag (ACE2-Fc) was obtained from GenScript. The S1-Fc and S2-Fc of SARS2-S and S2-Fc of SARS1-S were expressed in HEK293T cells and used as cell culture supernatant. The purified SARS2-S S1-Fc and S2-Fc from HEK293 cells were also obtained from Sino Biological. The purified human  $\alpha_5\beta_1$  and  $\alpha_8\beta_1$  ectodomains with C-terminal ACID-BASE coiled-coil and Flag tag were obtained from Sino Biological. Human  $\alpha_5\beta_1$  ectodomain with C-terminal ACID-BASE coiled-coil, Strep-Tag II, and His-tag was purified from HEK293 cells as described before (8).

### *Virus infection assay.*

The SARS2-S-Pseudotyped Lentiviral Kit was from BEI Resources (NR-52948). The SARS-CoV-2 S-pseudotyped lentiviral particles were generated using the SARS-CoV-2, Wuhan-Hu-1 Spike-Pseudotyped Lentiviral kit following the published protocol (9). In brief, HEK-293T- $\alpha_5$ -KO cells were seeded in a 6-well plate one day before transfection to reach 80% confluence. One well of cells were co-transfected using TransIT-VirusGEN Transfection Reagent (Mirus) with 1  $\mu$ g lentiviral backbone plasmid pHAGE-CMV-Luc2-IRES-ZsGreen-W, 0.22  $\mu$ g each of lentiviral helper plasmids HDM-Hgpm2, pHDM-tat1b, and pRCCMV-Rev1b, and 0.34  $\mu$ g plasmid expressing viral entry protein: vesicular stomatitis virus G (VSV-G), SARS-CoV S, or SARS-CoV-2 S. The cell culture supernatant containing pseudoviruses were harvested 60 hours after transfection and centrifuged at 500g for 5 min. The titers of pseudoviruses were measured using HEK293T-ACE2 cells by the luciferase assay (9). The supernatants were aliquoted in small volumes and stored at -80°C until use. For the pseudovirus entry assay, HEK-293T-ACE2 or HEK-293T-ACE2- $\alpha_5$ -KO cells were seeded at  $1.25 \times 10^5$  cells/well into 48-well plates that were pre-coated with 5  $\mu$ g/ml poly-lysine. In some experiments, HEK-293T-ACE2- $\alpha_5$ -KO cells were transfected with human  $\alpha_5$  plasmid for 48 hours before seeding. At 18 hours post-seeding,

cells were infected with pseudotyped lentiviral particles supplemented with 5 µg/ml polybrene. 48 hours after infection, cells were harvested for luciferase activity measurement using Bright-Glo Luciferase Assay System (Promega) according to the manufacturer's instruction. Briefly, 30 µl of suspension cells at  $5 \times 10^6$ /ml were incubated with 30 µl luciferase reagent for 4 min at room temperature in the dark. Luciferase activity was measured using Enspire Multimode Plate Reader (Perkin Elmer). All experiments were performed at least three times and expressed as mean  $\pm$  standard deviation (SD).

The recombinant Vesicular Stomatitis Virus (rVSV) expressing SARS2-S and EGFP was from BEI resources (NR-55284) (10) or provided by Sean Whelan (11, 12). The rVSV expressing VSV-G and EGFP was a gift from Kartik Chandran. For the rVSV-S and rVSV-G infection assay, Vero E6 and Vero E6  $\alpha$ 5-KO cells were seeded at  $2.4 \times 10^5$  cells/well into 48-well plate. Subsequently, cells were incubated with rVSV-S ( $3.56 \times 10^5$  TCID<sub>50</sub>) or rVSV-G for 6 hours at 37°C. The infected cells were imaged using EVOS M7000 imaging system with Plan Fluor 4X objective lens (numerical aperture of 0.13). The infection was quantified by measuring the number of EGFP-positive cells, mean EGFP area, or total EGFP-positive areas using CellProfiler software.

For virus inhibition assay, HEK-293T-ACE2 or HEK-293T-ACE2- $\alpha$ 5-KO cells were seeded at  $6 \times 10^5$  cells/well into 24-well plates the day before infection. Cells were incubated with 0.1 mM ATN-161 (Selleckchem) for 1 hour at 37°C. Subsequently, rVSV-S ( $1.78 \times 10^5$  TCID<sub>50</sub>) was used to infect the cells. As a control, rVSV-S ( $1.78 \times 10^5$  TCID<sub>50</sub>) was incubated with pooled human sera from COVID-19 vaccinated donors (NRH-21765, BEI Resources) for 1 hour at 37°C. The sera/virus mix was then added to HEK-293T-ACE2 or HEK-293T-ACE2- $\alpha$ 5-KO cells. 6 hours post-infection, cells were harvested for infection measurement using flow cytometry.

#### *Cell-cell fusion assay.*

For cell-cell fusion induced by virus infection, the infected cells were imaged using EVOS fluorescence microscope. The cell-cell fusion was quantified by measuring the mean or total EGFP areas using CellProfiler. For cell-cell fusion assay based on the split GFP system, HEK-293T- $\alpha$ 5-KO cells were transfected with SARS2-S plus GFP11 with or without  $\alpha$ 5 $\beta$ 1 or transfected with ACE2 plus GFP1-10 for 48 hours. The SARS2-S cells and ACE2 cells were detached by repeatedly pipetting without trypsinization. Equal number of cells were then co-cultured for 6 and 24 hours before imaging with EVOS fluorescence microscope. Alternatively, the detached SARS2-S/ $\alpha$ 5 $\beta$ 1 cells were pre-treated with 1 mM ATN-161 or 200 nM MK-0429 (MedChemExpress) for 1 hour before co-culturing with ACE2 cells in the presence of inhibitor. Three random images were taken with Plan Fluor 4X objective lens (numerical aperture of 0.13), equipped with Sony 1cx285AQ color CCD camera. The cell-cell fusion was quantified by measuring the mean or total EGFP areas using CellProfiler.

#### *Protein-protein interaction assay.*

The interaction between the S proteins and integrin  $\alpha_5\beta_1$  was analyzed by ELISA and pull-down assays. For ELISA, 96-well ELISA plate was coated with 50  $\mu\text{l}$ /well of purified SARS2-S or SARS1-S ectodomain, SARS2-S RBD, or BSA at an equal molar concentration in PBS at 4°C overnight. The coating concentration of SARS2-S was 1  $\mu\text{g}/\text{ml}$  for the ACE2 binding assay. The plate was blocked with 200  $\mu\text{l}$ /well of 1% (w/v) BSA in TBS-Ca/Mg (Tris-buffered saline with 1 mM  $\text{CaCl}_2$  and 1 mM  $\text{MgCl}_2$ ) at 37°C for 1 hour. Each well was then washed three times with 200  $\mu\text{l}$  of TBS plus 1% BSA. 50  $\mu\text{l}$  of purified  $\alpha_5\beta_1$  ectodomain or ACE2-Fc at different concentrations were added into each well and incubated for 1 hour at room temperature. After washing three times with TBS-Ca/Mg plus 0.05% (v/v) Tween 20, 50  $\mu\text{l}$  of anti- $\alpha_5$  mAb VC5 (BD Biosciences) at 5  $\mu\text{g}/\text{ml}$  was added into each well and incubated for 1 hour at room temperature. After repeating the washing step, 50  $\mu\text{l}$  of 1:5000 diluted goat anti-mouse IgG-HRP (Jackson Laboratory) was added into each well and incubated for 1 hour at room temperature. Each well was then washed 4 times and detected by adding 100  $\mu\text{l}$  of 1-Step™ Ultra TMB-ELISA Substrate Solution (ThermoFisher Scientific) for 30 min at room temperature. The reaction was stopped by adding 100  $\mu\text{l}$  of 2M sulfuric acid, and OD<sub>450</sub> was measured using Infinite M200 PRO Multimode Microplate Reader (Tecan). At least three independent experiments were performed for each assay.

Either purified proteins, cell culture supernatants, or cell lysates were used for the pull-down assay. For the purified proteins, 1  $\mu\text{g}$  of Flag-tagged integrin ectodomain was mixed with 60  $\mu\text{l}$  slurry of protein A beads in the absence or presence of 0.5  $\mu\text{g}$  SARS2 S1-Fc or SARS2 S2-Fc in 500  $\mu\text{l}$  PBS buffer. Alternatively, the supernatant of total cell lysates of HEK293T-ACE2 and the cell culture supernatant of HEK293T cell transfected with SARS2 S2-Fc or SARS1 S2-Fc were used. In another pull-down assay using purified proteins, 1  $\mu\text{g}$  each of Flag-tagged  $\alpha_5\beta_1$  ectodomain and ACE2-Fc were mixed with protein A beads in the absence or presence of SARS2-S ectodomain. For the pull-down assay of full-length proteins, HEK293T- $\alpha_5$ -KO cells were transfected with C9-tagged or PC-tagged full-length S constructs plus EGFP or  $\alpha_5$ -EGFP/ $\beta_1$  or  $\alpha_5/\beta_1$ -GFP for 36-48 hours. The cells were lysed by PBS plus 1% Triton X-100 and Mammalian ProteaseArrest™ protease inhibitor cocktail (Gibco) and cleared by centrifugation at 15,000 rpm for 15 minutes. The supernatants were mixed with GFP-Trap Magnetic Agarose (Chromotek). For all the pull-down assays, the mixtures were incubated overnight on a roller at 4°C. The beads were washed at least three times with PBS buffer or PBS plus 1% Triton X-100, drained by gel-loading pipette tips, and eluted by 1 x SDS-PAGE loading buffer. The eluted samples were subjected to western blot and detected by anti-Flag (FG4R, Invitrogen), anti-human IgG Fc (Jackson ImmunoResearch), anti-His (27E8, Cell signaling), anti-C9 (1D4, Novus), anti-PC (ICL, Inc), or anti-EGFP (OriGene Technologies).

For protein analysis using dynamic light scattering (DLS),  $\alpha_5\beta_1$  ectodomain was further purified with an analytical microscale gel filtration column Suprose™ 6 Increase 3.2/300. Protein in each fraction was diluted to 0.2 mg/ml and filtered through a 0.1  $\mu\text{m}$  inorganic membrane filter (Whatman™, GE Healthcare Life Sciences). 2  $\mu\text{l}$  of filtered  $\alpha_5\beta_1$  from each fraction was loaded into a 2  $\mu\text{l}$  quartz cell (ZMV1002, Hellma Analytics), which was then inserted into the Zetasizer  $\mu\text{V}$  instrument (Malvern) for DLS analysis. The Z-

Average (d.nm) in the Intensity PSD (M) or the Volume PSD (M) was used for diameter determination.

*NF-κB activation, cytokine release, and GSDMD cleavage.*

The S-induced NF-κB activation, IL-6 release, and GSDMD cleavage in iHUVeC cells were performed with a cell-adhesion-based assay. For NF-κB activation assay, 6-well plates were coated with 1 ml/well of 10 μg/ml purified S protein constructs or poly-K in PBS at 4°C overnight, and then blocked with 1% BSA at 37°C for 1 hour.  $2 \times 10^6$  HUVEC cells suspended in DMEM without FBS were seeded into each well and incubated for 2 hours in a 37°C incubator with 5% CO<sub>2</sub>. The adhered cells were detached, spun down, and solubilized by adding 50 μl of SDS-PAGE loading buffer and boiled for 20 minutes. The samples were analyzed using the Jess automated western blotting system with 12-230kDa Separation Module following the manufacturer's protocol (ProteinSimple). Anti-NF-κB(p65) (Santa Cruz Biotechnology) and anti-phospho-NF-κB(p65) (Ser536) (Cell Signaling) were used for protein detection. The data were analyzed using AlphaView software (ProteinSimple) and presented by phospho-NF-κB as a percentage of total NF-κB. The total and the cleaved N-terminal fragment of GSDMD in the total cell lysates were detected by anti-GSDMD (Cell Signaling) using standard western blot. The cleavage of GSDMD was calculated by the intensity of N-terminal fragment as a percentage of total GSDMD intensity (full-length plus N-terminal fragment).

For the IL-6 release assay, 48-well plates were coated with 120 μl/well of 10 μg/ml purified S protein constructs, poly-K, or LPS in PBS at 4°C overnight, and then blocked with 1% BSA at 37°C for 1 hour. 200 μl of HUVEC cells at  $2 \times 10^6$  /ml were seeded on each well and incubated in a 37 °C incubator with 5% CO<sub>2</sub> for 2 hours. Triplicate wells were used for each condition. For rolipram and cAMP inhibition assay, the cells were pre-treated with different concentrations of rolipram or cAMP for 30 minutes before seeding to the coated plate. As a control, the cells were also treated with DMSO at the concentration (1%) corresponding to that in the highest tested concentration of rolipram. The supernatants were collected and cleared by centrifugation at 13,000 rpm for 2 minutes. The IL-6 concentration in the supernatant was measured using human IL-6 Quantikine ELISA kit according to the manufacturer's protocol (R&D Systems). The data of rolipram assay were presented as a percentage of inhibition calculated based on the DMSO control.

The S-induced NF-κB activation, IL-6 release, and GSDMD cleavage in HULEC-5a cells were performed using suspension cells. For NF-κB activation assay, suspended  $1 \times 10^6$  HULEC-5a cells in DMEM without FBS were incubated with 10 μg/ml SARS2-S, 10 μg/ml RBD, or 5 μg/ml LPS in the presence or absence of 1 mM D-cAMP for 2 h. The cells were spun down and solubilized by adding 50 μl of SDS-PAGE loading buffer and boiled for 20 minutes. The samples were analyzed using the Jess automated western blotting system with 12-230kDa Separation Module following the manufacturer's protocol (ProteinSimple). Anti-NF-κB(p65) (Santa Cruz Biotechnology) and anti-phospho-NF-κB(p65) (Ser536) (Cell Signaling) were used for protein detection. The data were analyzed using AlphaView software (ProteinSimple) and presented by phospho-NF-κB

as a percentage of total NF- $\kappa$ B. The total and the cleaved N-terminal fragment of GSDMD in the total cell lysates were detected by anti-GSDMD (Cell Signaling) using standard western blot. The cleavage of GSDMD was calculated by the intensity of N-terminal fragment as a percentage of total GSDMD intensity (full-length plus N-terminal fragment). The supernatant was used for IL-6 and IL-1 $\beta$  release analysis. Triplicate wells were used for each condition. The IL-6 concentration in the supernatant was measured using human IL-6 and IL-1 $\beta$  Quantikine ELISA kit according to the manufacture's protocol (R&D Systems).

### *Statistical analysis.*

Statistical analysis was carried out on at least three individual datasets and analyzed with GraphPad Prism software. Unpaired two-tailed t test or One-Way ANOVA Tukey's multiple comparisons test was performed between control and treated experimental groups. P-values  $\leq 0.05$  were considered significant. For dose–response experiments, data were normalized and analyzed using nonlinear curve fitting for the log (inhibitor) versus response (three parameters) curves.

## **References**

1. A. M. M. Thinn, Z. Wang, J. Zhu, The membrane-distal regions of integrin alpha cytoplasmic domains contribute differently to integrin inside-out activation. *Sci Rep* **8**, 5067 (2018).
2. C. M. Laukaitis, D. J. Webb, K. Donais, A. F. Horwitz, Differential dynamics of alpha 5 integrin, paxillin, and alpha-actinin during formation and disassembly of adhesions in migrating cells. *J Cell Biol* **153**, 1427-1440 (2001).
3. M. Kodaka *et al.*, A new cell-based assay to evaluate myogenesis in mouse myoblast C2C12 cells. *Exp Cell Res* **336**, 171-181 (2015).
4. J. Shang *et al.*, Structural basis of receptor recognition by SARS-CoV-2. *Nature* **581**, 221-224 (2020).
5. A. V. Moses *et al.*, Long-term infection and transformation of dermal microvascular endothelial cells by human herpesvirus 8. *J Virol* **73**, 6892-6902 (1999).
6. X. Cai, A. M. M. Thinn, Z. Wang, H. Shan, J. Zhu, The importance of N-glycosylation on beta3 integrin ligand binding and conformational regulation. *Sci Rep* **7**, 4656 (2017).
7. Z. Wang, J. Zhu, Measurement of Integrin Activation and Conformational Changes on the Cell Surface by Soluble Ligand and Antibody Binding Assays. *Methods Mol Biol* **2217**, 3-15 (2021).
8. J. Li *et al.*, Conformational equilibria and intrinsic affinities define integrin activation. *Embo J* 10.15252/emj.201695803 (2017).
9. K. H. D. Crawford *et al.*, Protocol and Reagents for Pseudotyping Lentiviral Particles with SARS-CoV-2 Spike Protein for Neutralization Assays. *Viruses* **12** (2020).

10. M. E. Dieterle *et al.*, A Replication-Competent Vesicular Stomatitis Virus for Studies of SARS-CoV-2 Spike-Mediated Cell Entry and Its Inhibition. *Cell Host Microbe* **28**, 486-496 e486 (2020).
11. J. B. Case *et al.*, Neutralizing Antibody and Soluble ACE2 Inhibition of a Replication-Competent VSV-SARS-CoV-2 and a Clinical Isolate of SARS-CoV-2. *Cell Host Microbe* **28**, 475-485 e475 (2020).
12. A. J. B. Kreuzberger *et al.*, SARS-CoV-2 requires acidic pH to infect cells. *Proceedings of the National Academy of Sciences of the United States of America* **119**, e2209514119 (2022).

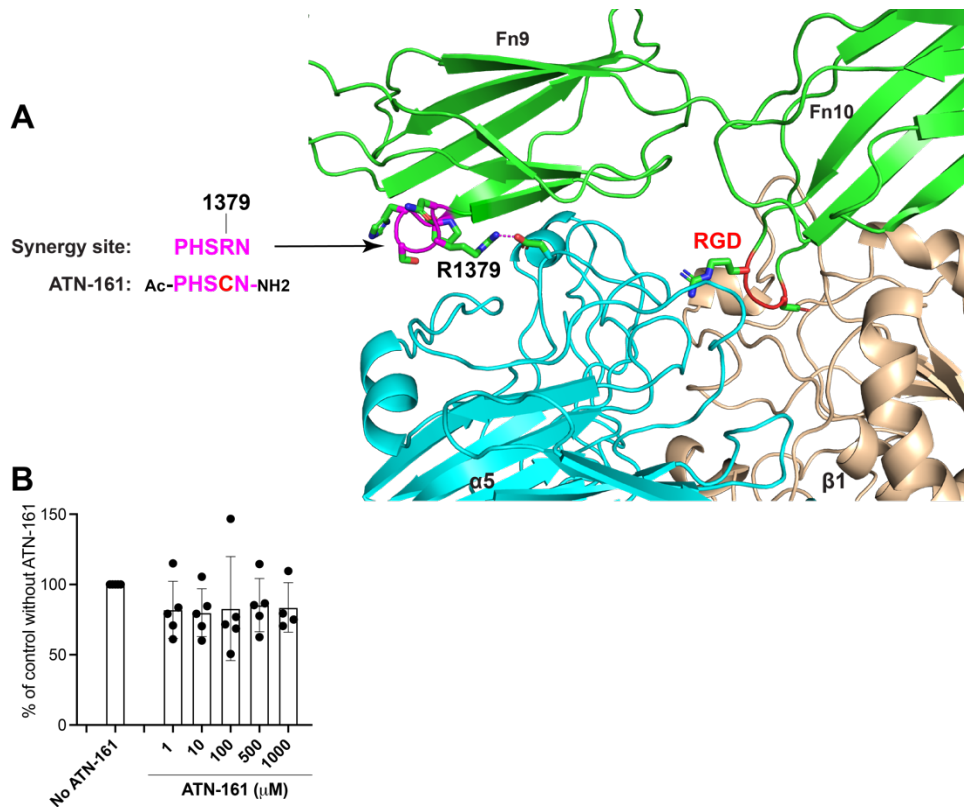

**Fig. S1. The design of ATN-161 and the interaction of the RGD and synergy sites of fibronectin with  $\alpha_5\beta_1$ .** (A) Cryo-EM structure of  $\alpha_5\beta_1$  in complex with fibronectin domains 7-10 (PDB 7NWL) shows the interaction of the Fn10 RGD site with both  $\alpha_5$  and  $\beta_1$  and the interaction of Fn9 PHSRN synergy site with  $\alpha_5$  only. The peptide inhibitor ATN-161 was designed based on the PHSRN synergy site with an Arg to Cys substitution at position 1379. However, the R1379 is critical for the PHSRN site to interact with  $\alpha_5$  by forming a salt bridge, which is the only polar contact between PHSRN and  $\alpha_5$ . The Arg mutation in ATN-161 may decrease its binding with  $\alpha_5$  if it binds to the synergy binding site of  $\alpha_5$ . The structural basis of how ATN-161 blocks  $\alpha_5\beta_1$  function requires further investigation. (B) ATN-161 does not inhibit the interaction between SARS2-S and  $\alpha_5\beta_1$ . The purified  $\alpha_5\beta_1$  ectodomain at 25  $\mu$ g/ml was incubated with ATN-161 at different concentrations for 1 h before adding to the ELISA plate coated with 15  $\mu$ g/ml purified SARS2-S protein. The binding of  $\alpha_5\beta_1$  was detected by the anti- $\alpha_5$  mAb VC5 and presented as a percentage of control without ATN-161. Data are mean  $\pm$  SD from four independent repeats.



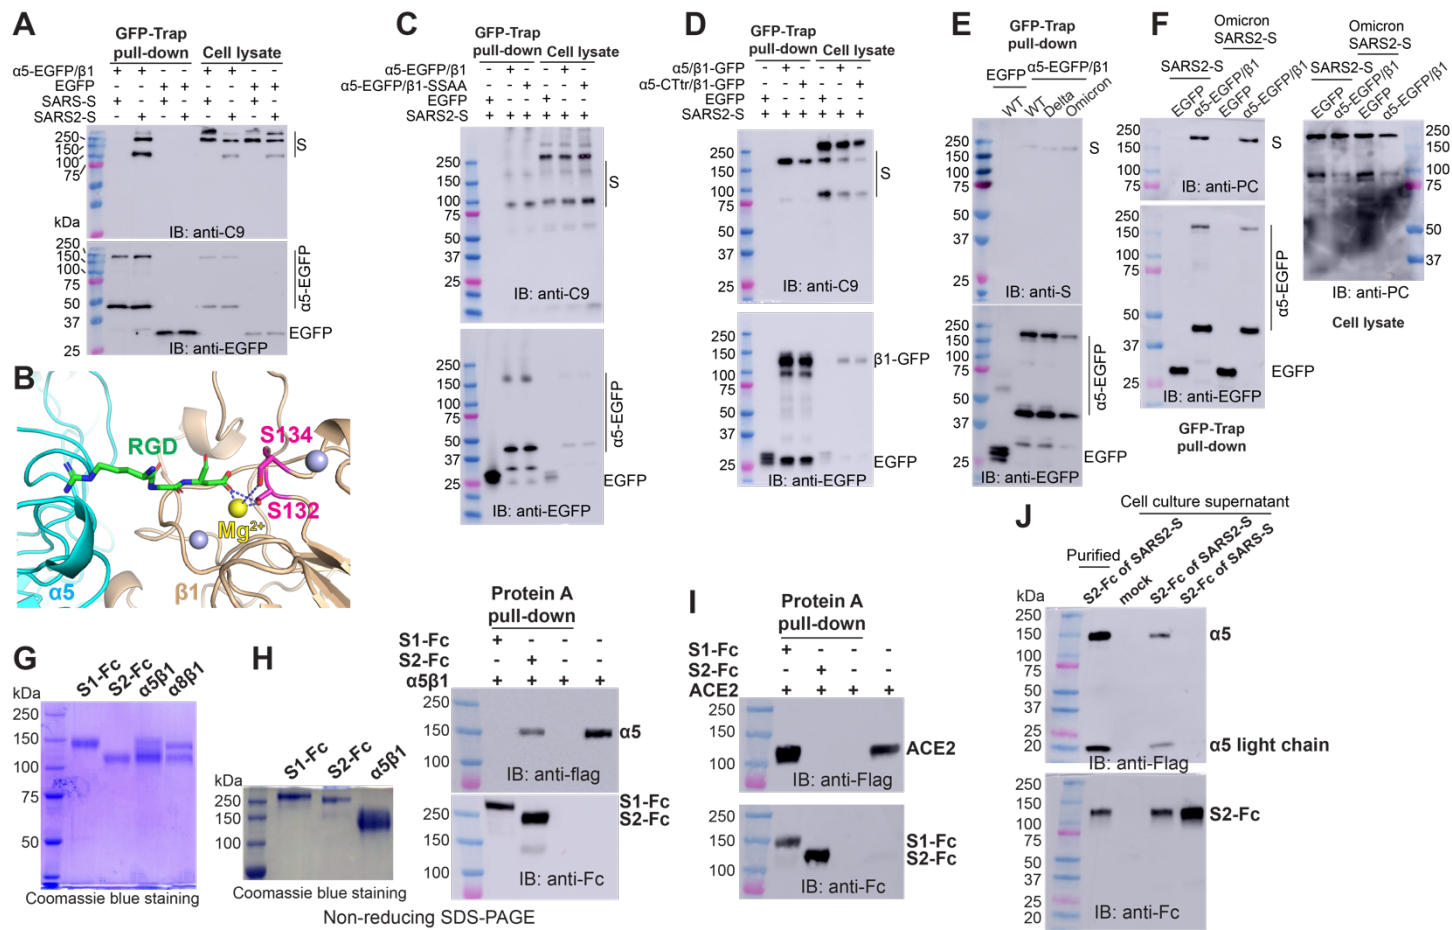

**Fig. S2. Integrin  $\alpha_5\beta_1$  interacts with SARS2-S protein independent of the RGD motif.** (A) Pull-down assay of full-length  $\alpha_5\beta_1$  and S proteins. HEK293T- $\alpha_5$ -KO cells were transfected with  $\alpha_5$ -EGFP/ $\beta_1$  or EGFP plus C-terminal C9-tagged SARS-S or SARS2-S. The cell lysates were immunoprecipitated with GFP-Trap beads. The precipitated samples were immunoblotted with anti-C9 and reblotted with anti-EGFP under reducing condition. The SARS2-S was cleaved into S1 and S2 subunits. The  $\alpha_5$  light chain tagged with EGFP was also detected. (B) Crystal structure of  $\alpha_5\beta_1$  bound with RGD peptide (PDB 4WK0). Metal ions are shown as spheres. The conserved S132 and S134 of  $\beta_1$  subunit coordinate with RGD and  $Mg^{2+}$ . Mutating the S132S134 to Ala ( $\beta_1$ -SSAA) abolishes  $Mg^{2+}$  and RGD binding. (C) HEK293T- $\alpha_5$ -KO cells were transfected with  $\alpha_5$ -EGFP/ $\beta_1$ ,  $\alpha_5$ -EGFP/ $\beta_1$ -SSAA, or EGFP plus C-terminal C9-tagged SARS-S or SARS2-S. The cell lysates were immunoprecipitated with GFP-Trap beads. (D) HEK293T- $\alpha_5$ -KO cells were transfected with  $\alpha_5/\beta_1$ -GFP,  $\alpha_5$ -CTtr/ $\beta_1$ -GFP, or EGFP plus C-terminal C9-tagged SARS1-S or SARS2-S. The cell lysates were immunoprecipitated with GFP-Trap beads. (E) HEK293T- $\alpha_5$ -KO cells transfected with  $\alpha_5$ -EGFP/ $\beta_1$  or EGFP were incubated with purified S protein of WT, Delta, or Omicron variant. The cell lysates were immunoprecipitated with GFP-Trap beads. (F) HEK293T- $\alpha_5$ -KO cells were transfected with full-length PC-tagged SARS2-S or Omicron SARS2-S plus EGFP or  $\alpha_5$ -EGFP/ $\beta_1$  for 36 hours. Total cell lysates were precipitated with GFP-Trap beads. The S proteins were detected by immunoblot with anti-PC. (G) SDS-PAGE

of purified S1-Fc and S2-Fc of SARS2-S and Flag-tagged integrin ectodomains. **(H)** SDS-PAGE of purified S1-Fc and S2-Fc under non-reducing condition and protein A beads pull-down assay. The purified  $\alpha_5\beta_1$  was incubated with S1-Fc or S2-Fc and precipitated by protein A beads. The precipitated samples were immunoblotted with anti-Flag and anti-Fc under non-reducing condition. **(I)** The purified S1-Fc or S2-Fc were mixed with cell lysates containing Flag-tagged full-length ACE2 and precipitated by protein A beads. **(J)** The mixture of purified Flag-tagged  $\alpha_5\beta_1$  ectodomain and purified SARS2-S S2-Fc or the cell culture supernatant of HEK293T cells transfected with the DNA constructs of SARS2-S S2-Fc or SARS-S S2-Fc were immunoprecipitated with protein A beads. The samples were first immunoblotted with anti-Flag and then re-blotted with anti-Fc. The mock control was the cell culture supernatant of HEK293T transfected with the empty vector.

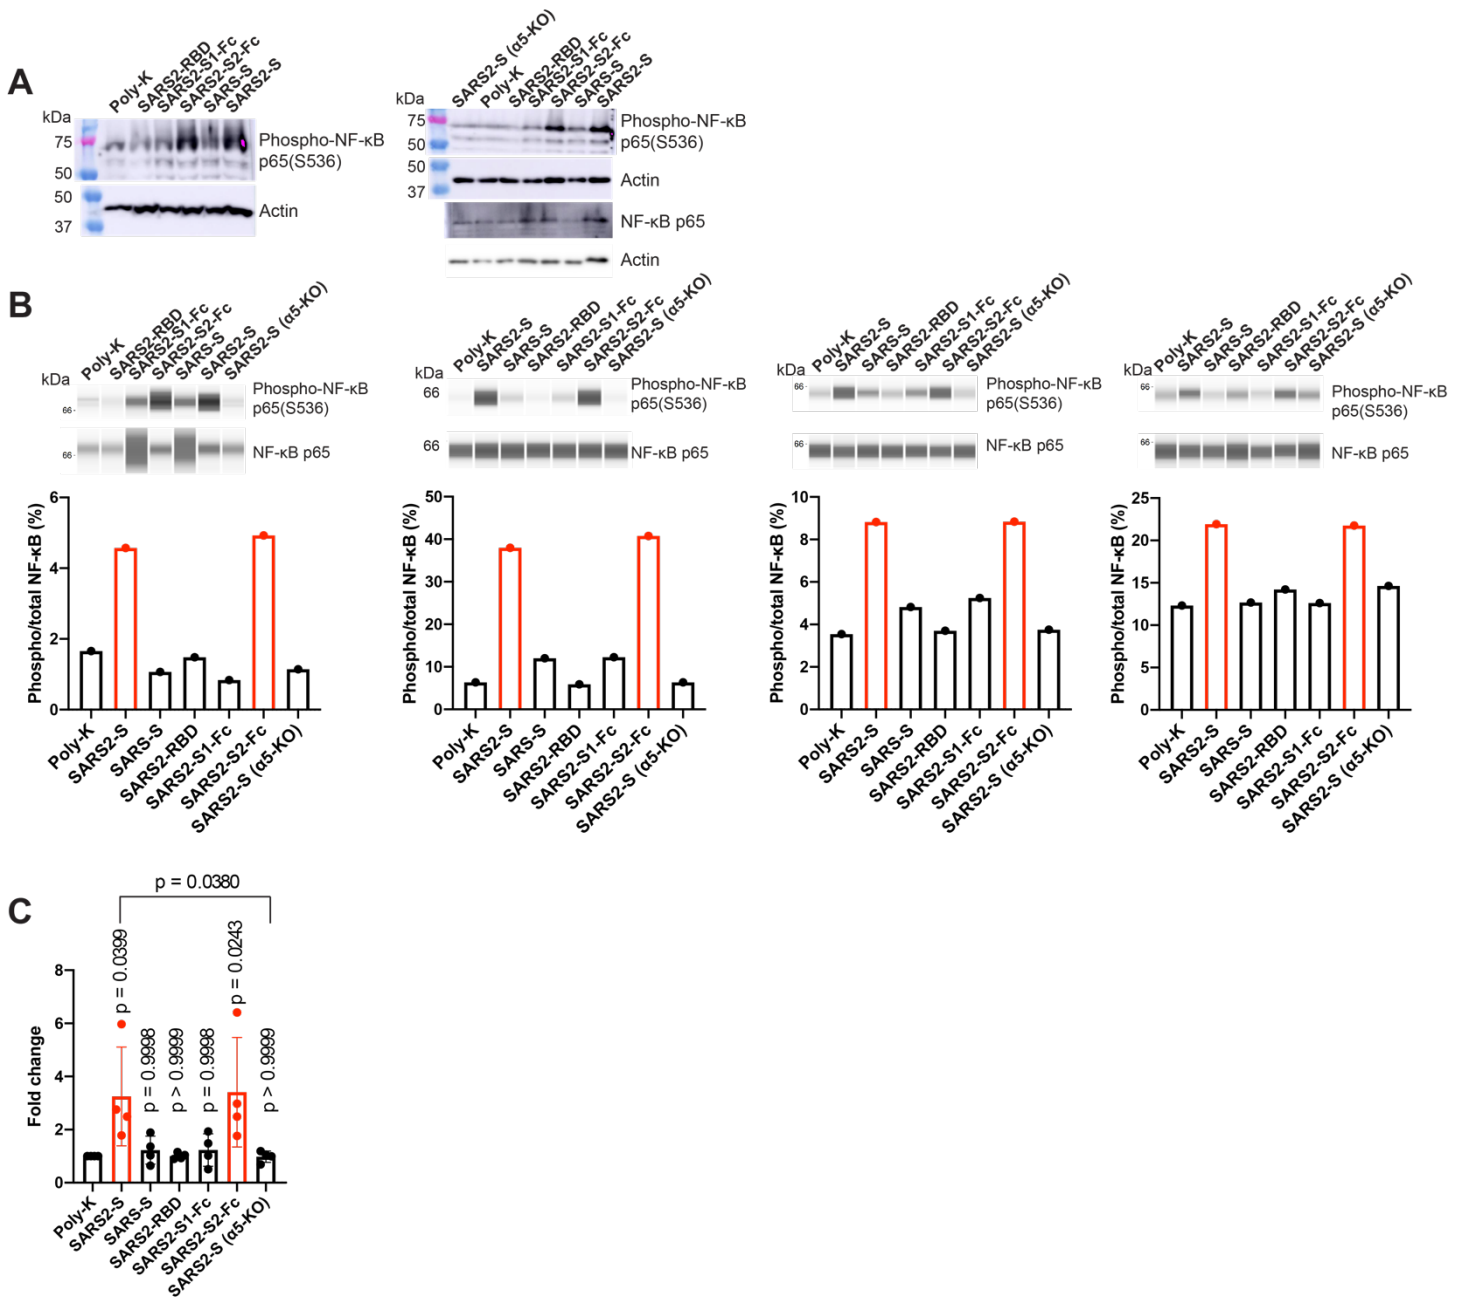

**Figure S3. SARS-CoV-2 S protein induces NK-κB activation and TNT formation via  $\alpha_5$  integrin in HUVEC cells.** (A, B) NF-κB activation in HUVEC cells attached to immobilized S proteins. HUVEC or HUVEC- $\alpha_5$ -KO cells were seeded into a plate coated with 10  $\mu$ g/ml indicated proteins for 2 h. Total cells were collected for Western blotting by traditional method (A) or automatic method by Jess (ProteinSimple) (B). Results of different repeats are shown. The data quantitation was shown for each repeat of automatic Western blot in B. (C) The quantitation of combined data of four individual repeats in panel B. The data are presented as fold changes relative to the control condition of poly-K. One-Way ANOVA Tukey's multiple comparisons test between poly-

K control and each experiment group or as indicated. Data are mean  $\pm$  SD from four independent repeats shown in panel B.
